# Supplementary material for: Testing seismic amplitude source location for fast debris-flow detection at Illgraben, Switzerland
Source: Copernicus journal article supplement (doi:10.5194/nhess-17-939-2017), 2017-06-22
Supplement: Supplementary file 1 [file nhess-17-939-2017-supplement.zip]

Archive with 3 entries (3 files):
- tl_3d.mp4
- tl_2d.mp4
- nhess-17-939-2017-supplement-title-page.pdf
