# Supplementary material for: Testing seismic amplitude source location for fast debris-flow detection at Illgraben, Switzerland
Source: Copernicus journal article supplement (doi:10.5194/nhess-17-939-2017), 2017-06-22
Supplement: Supplementary file 1 [file nhess-17-939-2017-supplement.zip › nhess-17-939-2017-supplement-title-page.pdf]

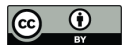

## *Supplement of*

# **Testing seismic amplitude source location for fast debris-flow detection at Illgraben, Switzerland**

**Fabian Walter et al.**

*Correspondence to:* Fabian Walter ([walter@vaw.baug.ethz.ch](mailto:walter@vaw.baug.ethz.ch))

- [nhess-17-939-2017-supplement-title-page.pdf](#)
- [tl\\_2d.mp4](#)
- [tl\\_3d.mp4](#)

The copyright of individual parts of the supplement might differ from the CC BY 3.0 License.
